# Supplementary material for: Quantitative Cathodoluminescence Mapping: A CdMgSeTe Thin-Film Case Study
Source: PubMed Central journal article supplement — ACS Omega. 2022 Oct 5;7(41):36873–9. doi: 10.1021/acsomega.2c05640 (PMC9583303; doi:10.1021/acsomega.2c05640), 2022-10-05

## Supplemental Information

### Quantitative Cathodoluminescence Mapping: CdMgSeTe Thin Film Case Study

Aida Torabi,<sup>†</sup> James Sullivan,<sup>†</sup> Carey Reich,<sup>‡</sup> Melissa A. Wunch,<sup>†</sup> Juan Alexandro Garcia,<sup>†</sup> Claudia Beck,<sup>†</sup> Amit H. Munshi,<sup>‡</sup> Tushar Shimpi,<sup>‡</sup> Mienie Roberts,<sup>†</sup> Walajabad Sampath,<sup>‡</sup> Taylor B. Harvey<sup>†,\*</sup>

<sup>†</sup>Department of Science and Mathematics, Texas A&M University-Central Texas, Killeen, TX 76549, USA

<sup>‡</sup>Department of Mechanical Engineering, Colorado State University, Ft. Collins, CO, 80523, USA

**Figure S1.** Transmission spectra of (black) Mg-435 and (red) Mg-450

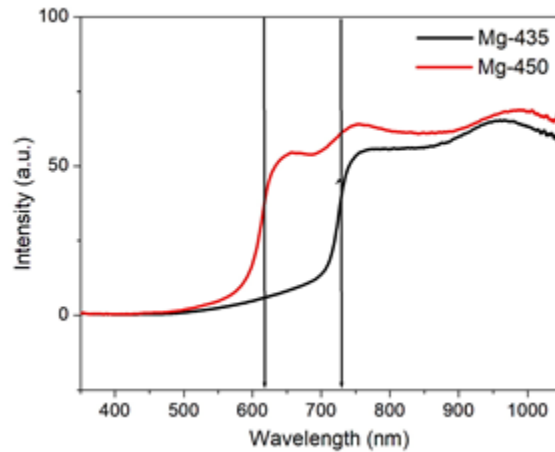

**Figure S2.** SEM images of  $\text{Cd}_{1-x}\text{Mg}_x\text{Se}_y\text{Te}_{1-y}$  films at different sublimation temperatures with magnification of 20kx and accelerating voltage of 5kv

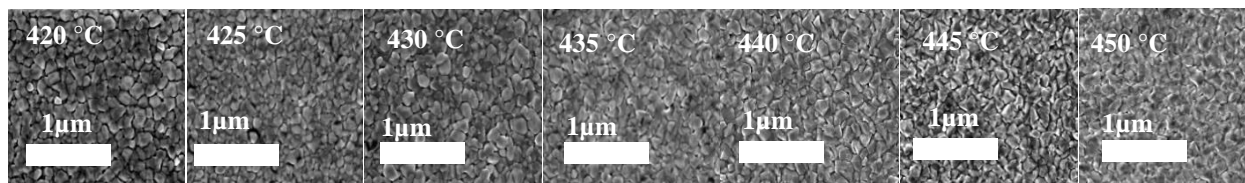

**Figure S3.** CL spectra of (left) Mg-435 and (right) Mg-450 with Gaussian fitting

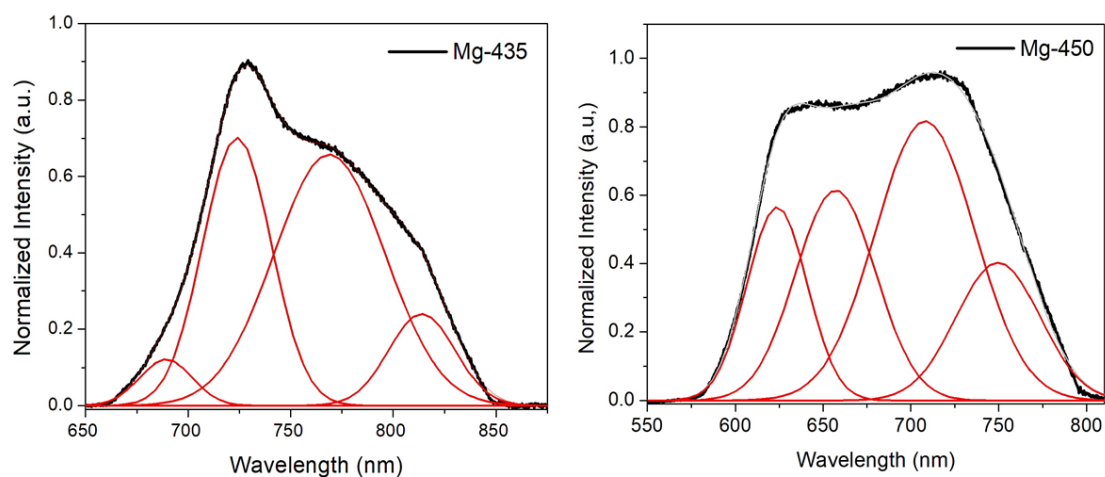

**Figure S4.** EDS spectra from Mg-435 (**top**) and Mg-450 (**bottom**). Sn, Cu, Zn, Al, Si signals from the back contacts and sample preparation. Mg and Se overlap and no independent Se fitting is possible or attempted. Cd, Te, Mg signals are not qualitatively accurate, but are within expect range.

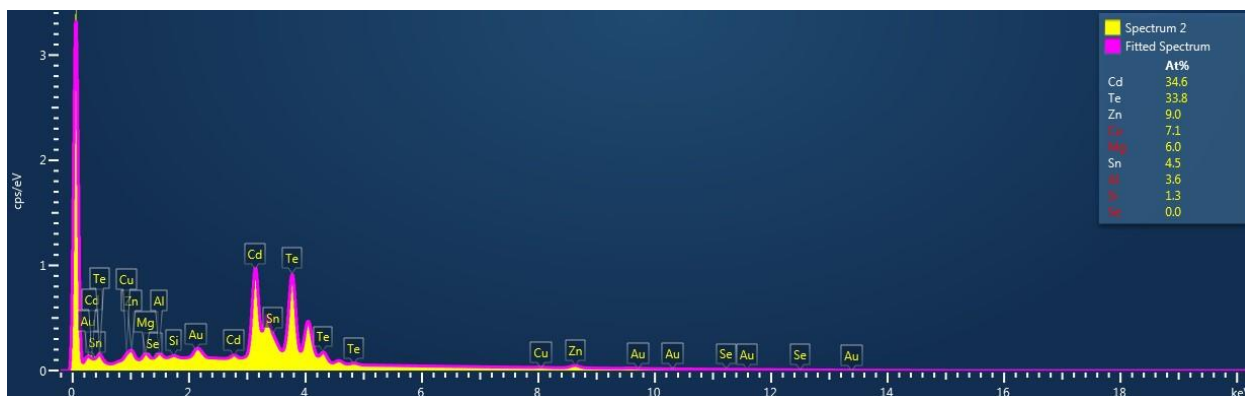

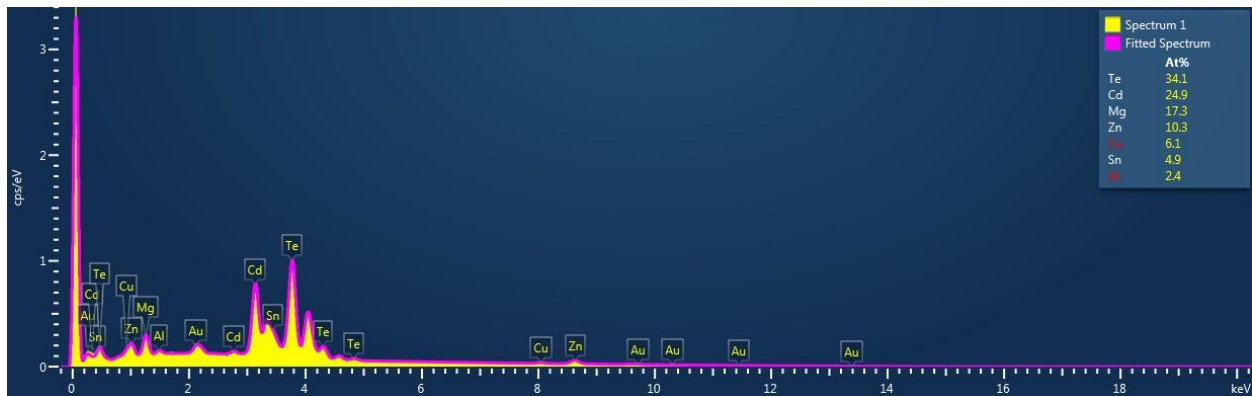

**Figure S5.** Plot of the relative intensity between the major local maxima grouping at 650 nm and 718 nm for Mg-450

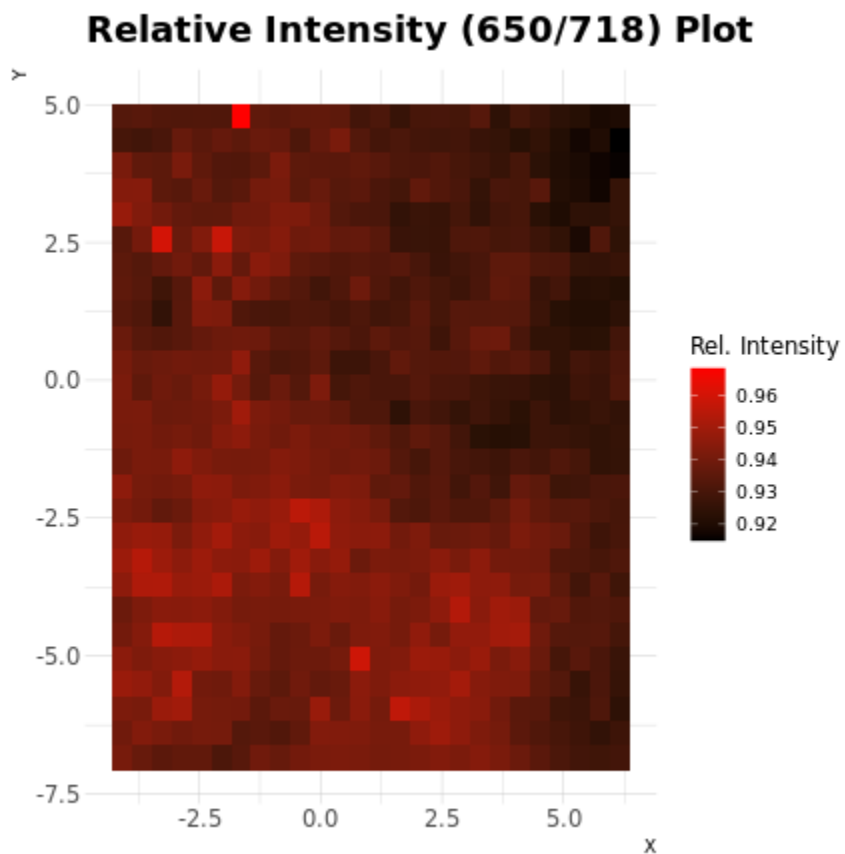

Supplement: ao2c05640_si_001.pdf [file ao2c05640_si_001.pdf]
